# Supplementary figures and images for: Water transport through a transmembrane channel formed by arylene ethynylene macrocycles
Source: Royal Society of Chemistry journal article supplement (doi:10.1039/c3ra43545h), 2013-10-28

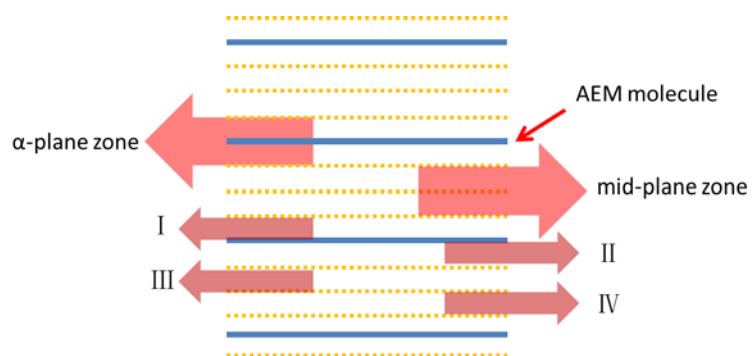

Supplement: c3ra43545h.pdf [file c3ra43545h.pdf]
